# Supplementary material for: PKR Protects the Major Catalytic Subunit of PKA Cpk1 from FgBlm10-Mediated Proteasome Degradation in Fusarium graminearum
Source: MDPI journal article supplement (doi:10.3390/ijms231810208), 2022-09-06
Supplement: s1 [file s1]

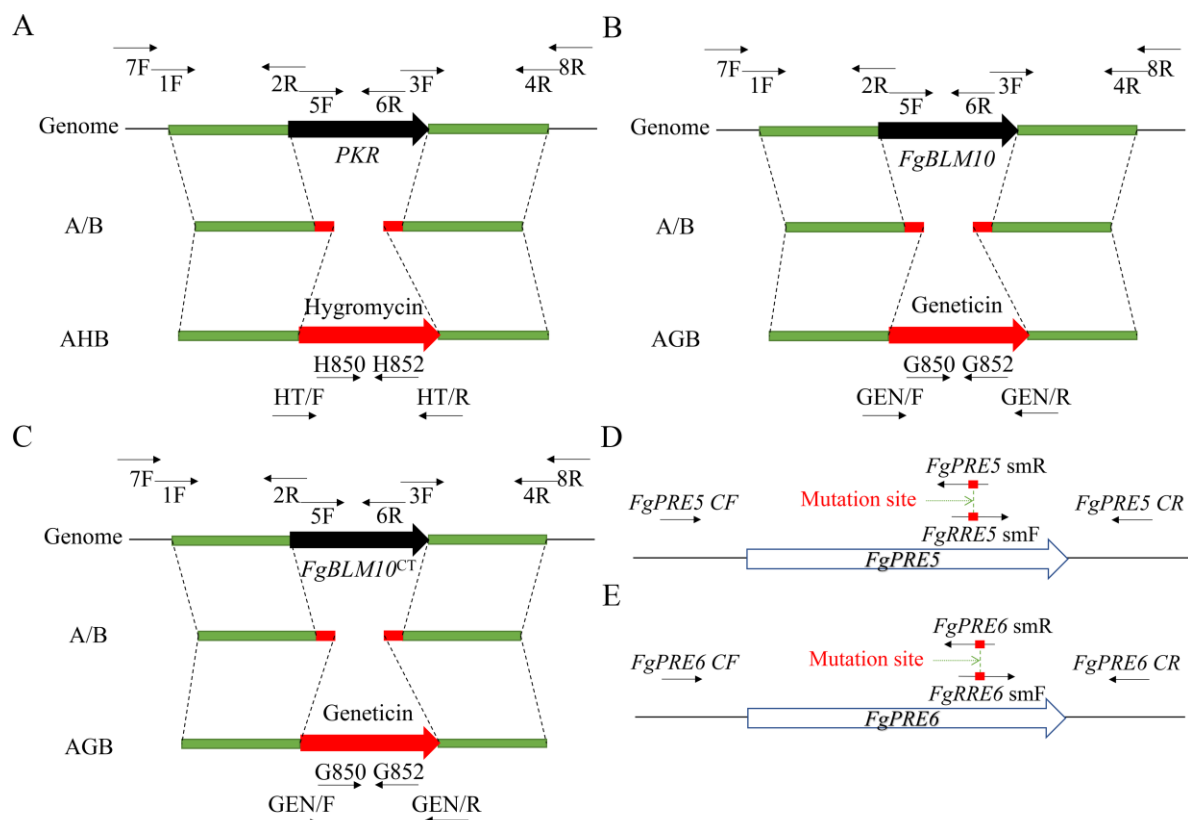

**Figure S1** Schematic diagram of the primers used to generate *PKR*, *FgBLM10* and *FgBLM10<sup>ΔCT</sup>* gene replacement constructs, and schematic diagram of the primers used to generate *FgPre5K62E* and *Pre6D82N* allele.

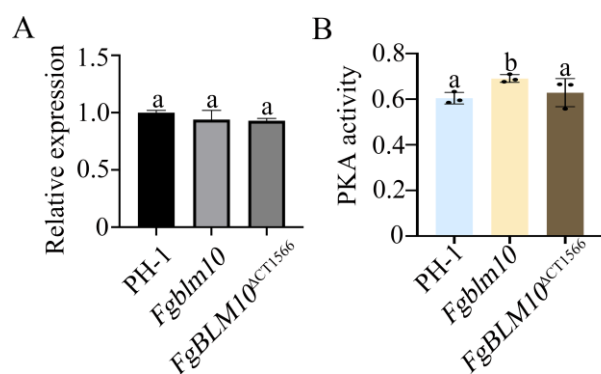

**Figure S2** CPK1 expression and PKA activity in the *Fgblm10* and *FgBLM10<sup>ΔCT1566</sup>* mutant; (A) qRT-PCR analysis of the wild-type strain PH-1, the *Fgblm10* mutant, and the *FgBLM10<sup>ΔCT1566</sup>* mutant; (B) PKA activity was assayed with proteins isolated from hyphae of PH-1, the *Fgblm10* mutant, and the *FgBLM10<sup>ΔCT1566</sup>* mutant.

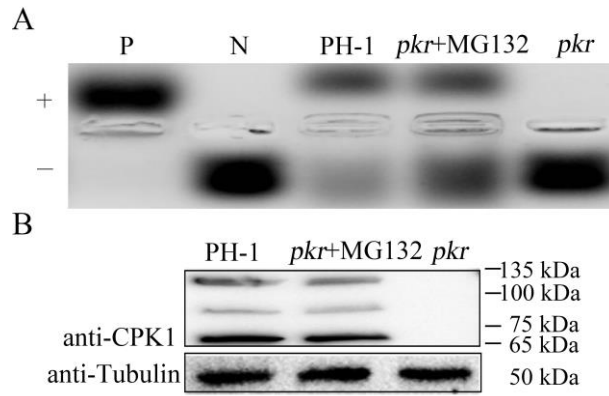

**Figure S3** Assays for PKA activity and Cpk1 expression. (A) Vegetative hyphae were harvested from 24-h YEPD cultures. PKA activities were assayed with the PepTag nonradioactive PKA assay kit (Promega, Madison, WI) as described [98]. (B) Western blots of proteins isolated from the marked strains were detected with an anti-FgCpk1 antibody

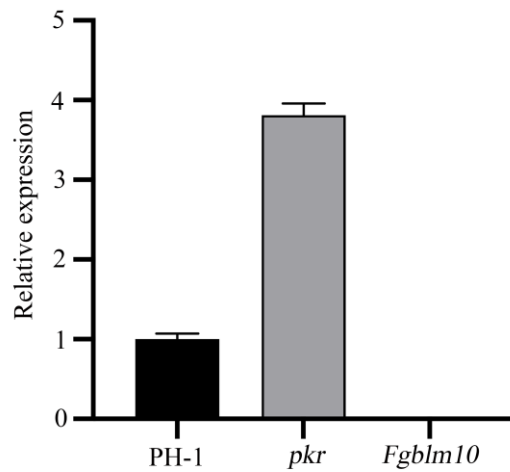

**Figure S4** FgBLM10 expression in wild type strain PH-1, *Fgblm10*, and *pk*r mutant.

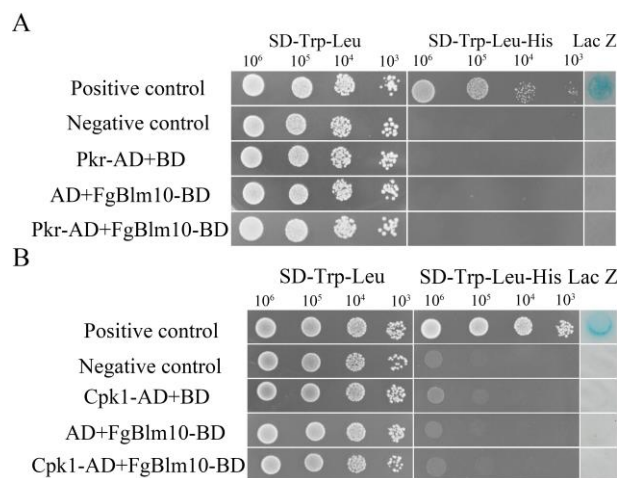

**Figure S5** Yeast two-hybrid assays for the interaction of Pkr and Cpk1 (bait) with FgBlm10 or FgBlm10 $\Delta$ ACT1566 (prey). The positive and negative controls were from the Matchmaker kit.

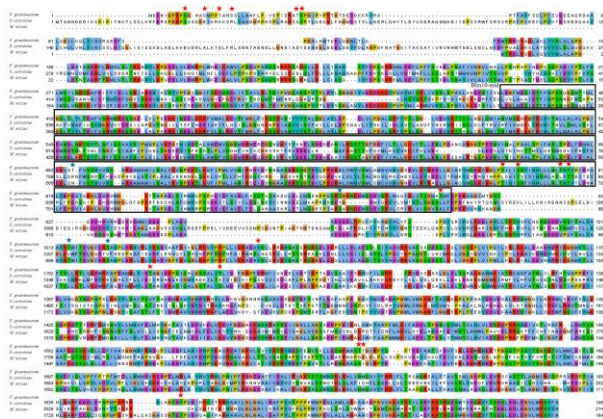

**Figure S6** Schematic drawing of the FgBlm10 protein and alignment with homologs from *Fusarium graminearum* (Fg), *Saccharomyces cerevisiae* (Sc), *Neurospora crassa* (Nc), *Magnaporthe oryzae* (Mo), *F. oxysporum* (Fo), and *F. verticillioides* (Fv). Phosphorylation sites of FgBlm10 in PH-1 are indicated by red stars, and phosphorylation sites of FgBlm10 in pkr mutant are indicated by blue stars.

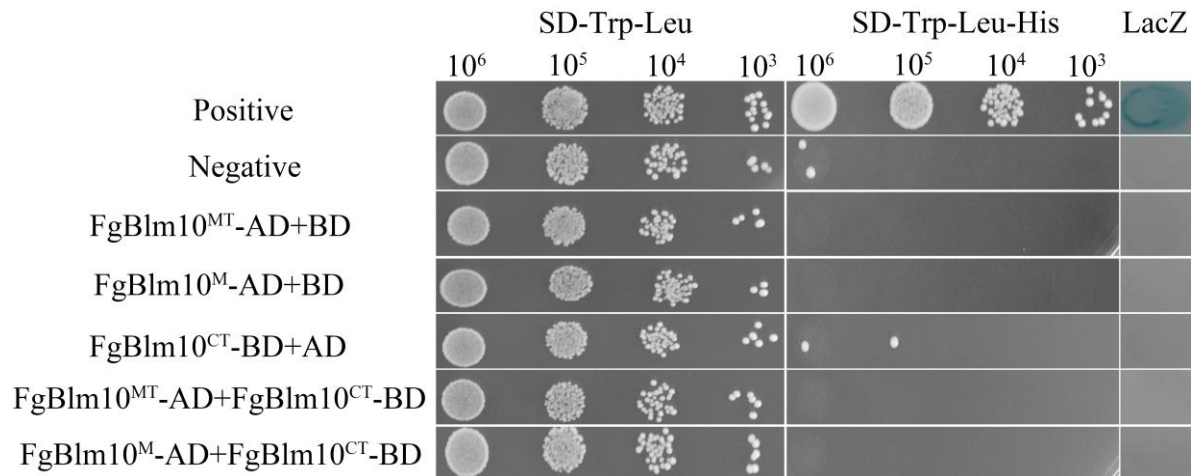

**Figure S7** Yeast two-hybrid assays for the interaction of FgBlm10 N-terminus with FgBlm10 C-terminus. The positive and negative controls were from the Matchmaker kit.

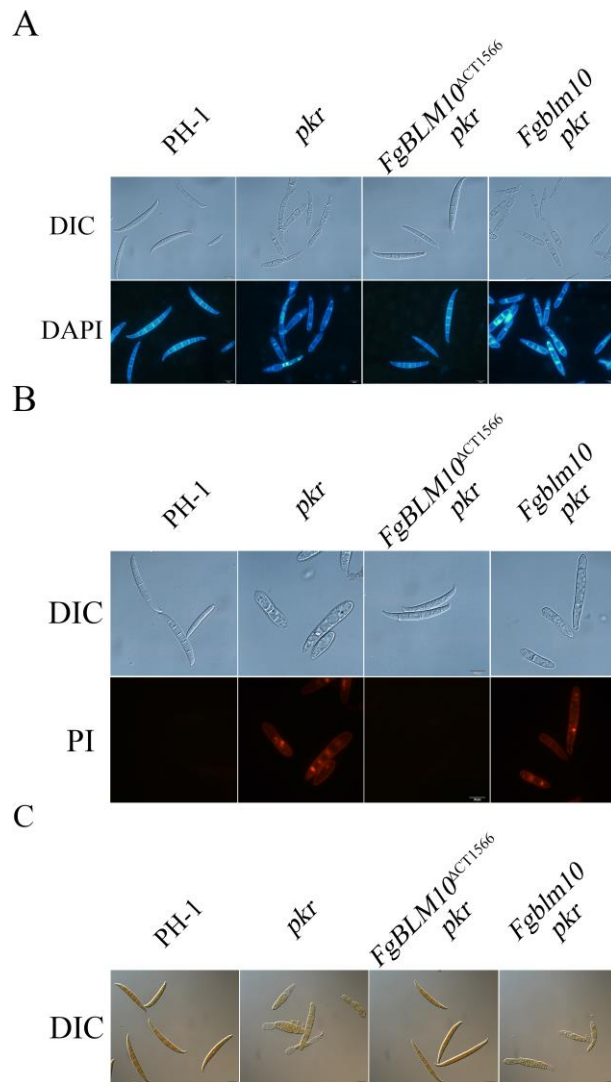

**Figure S8** FgBLM10 $\Delta$ CT1566 rescued the defects of the pk<sup>r</sup> mutant in cell viability, and glycogen accumulation. (A) Conidia of wild-type PH-1 (WT), pk<sup>r</sup> mutant (pk<sup>r</sup>), Fgblm10 mutant, and FgBLM10 $\Delta$ CT1566 mutant harvested from 5-day-old carboxymethyl cellulose (CMC) cultures and stained with DAPI (4',6-diamidino-2-phenylindole) to indicate the living cells. Bar = 10  $\mu$ m. (B) Conidia of the marked strains were stained with 5  $\mu$ g/mL propidium iodide (PI) to indicate the dead cells. Bar = 10  $\mu$ m. (C) Conidia of the marked strains were stained with KI/I<sub>2</sub> solution to indicate glycogen accumulation. Bar = 10  $\mu$ m.
