# Supplementary material for: PKR Protects the Major Catalytic Subunit of PKA Cpk1 from FgBlm10-Mediated Proteasome Degradation in Fusarium graminearum
Source: MDPI journal article supplement (doi:10.3390/ijms231810208), 2022-09-06
Supplement: s1 [file s1]

**Table S3 Proteins coimmunoprecipitated with FgBlm10-GFP in a pulldown assay.**

| <b>Accession</b>        | <b>Description</b>                        | <b>PSMs in PH-1</b> | <b>PSMs in <i>pk</i>r</b> |
|-------------------------|-------------------------------------------|---------------------|---------------------------|
| FGRRES_16648            | Blm10                                     | 1341                | 469                       |
| <b>proteasome</b>       |                                           |                     |                           |
| FGRRES_07282_M          | 20S proteasome component pre6             | 1                   | 1                         |
| FGRRES_10255_M          | 20S proteasome subunit alpha 1            | 2                   | 0                         |
| FGRRES_04410            | 20S proteasome subunit alpha type-2       | 2                   | 0                         |
| FGRRES_05365            | 20S proteasome subunit alpha type-4       | 1                   | 0                         |
| FGRRES_01160            | 20S proteasome subunit beta 6             | 1                   | 0                         |
| FGRRES_07956            | 26s proteasome regulatory subunit n9      | 21                  | 5                         |
| FGRRES_08444            | 26s proteasome regulatory subunit n7      | 12                  | 3                         |
| FGRRES_00306            | 26s proteasome regulatory subunit n6      | 19                  | 0                         |
| FGRRES_09432            | 26s proteasome regulatory subunit n5      | 18                  | 0                         |
| FGRRES_06045_M          | 26s proteasome regulatory subunit n3      | 12                  | 0                         |
| FGRRES_07938            | 26s proteasome regulatory subunit n12     | 12                  | 0                         |
| FGRRES_00781            | 26s proteasome regulatory subunit rpn11   | 8                   | 0                         |
| FGRRES_10738            | 26s proteasome regulatory subunit rpn-8   | 7                   | 0                         |
| FGRRES_01123            | 26s proteasome regulatory subunit n10     | 3                   | 0                         |
| FGRRES_00559_M          | 26s protease regulatory subunit 7         | 10                  | 0                         |
| FGRRES_02028            | 26s proteasome regulatory subunit t2      | 9                   | 0                         |
| FGRRES_10769            | 26s protease regulatory subunit 6b        | 12                  | 0                         |
| FGRRES_01198            | 26s protease subunit rpt4                 | 12                  | 4                         |
| FGRRES_11597            | 26s protease regulatory subunit 6a        | 12                  | 0                         |
| FGRRES_01605            | 26s protease regulatory subunit 8         | 14                  | 2                         |
| FGRRES_09783            | 26s proteasome regulatory subunit rpn-1   | 17                  | 0                         |
| FGRRES_16839            | 26s proteasome regulatory subunit n2      | 16                  | 0                         |
| <b>Ubiquitin system</b> |                                           |                     |                           |
| FGRRES_00380            | ubiquitin carboxyl-terminal hydrolase 16  | 1                   | 0                         |
| FGRRES_01863            | ubiquitin carboxyl-terminal hydrolase l5  | 1                   | 0                         |
| FGRRES_15861            | ubiquitin conjugation factor e4 b         | 3                   | 0                         |
| FGRRES_06244            | ubiquitin supergroup                      | 1                   | 0                         |
| FGRRES_10925            | ubiquitin thiolesterase                   | 17                  | 0                         |
| FGRRES_08920            | ubiquitin thiolesterase                   | 6                   | 0                         |
| FGRRES_16824            | ubiquitin thiolesterase                   | 6                   | 0                         |
| FGRRES_10292            | ubiquitin thiolesterase                   | 4                   | 0                         |
| FGRRES_06789            | ubiquitin thiolesterase                   | 1                   | 0                         |
| FGRRES_10941            | ubiquitin-40s ribosomal protein s27a      | 17                  | 0                         |
| FGRRES_09689            | ubiquitin-activating enzyme e1            | 12                  | 0                         |
| FGRRES_01505            | ubiquitin-conjugating enzyme e2 c         | 1                   | 0                         |
| FGRRES_04032            | ubiquitin-conjugating enzyme e2 d e       | 1                   | 0                         |
| FGRRES_09630            | ubiquitin-conjugating enzyme e2 g1        | 2                   | 0                         |
| FGRRES_05134            | ubiquitin-conjugating enzyme e2 r         | 1                   | 0                         |
| FGRRES_10805            | ubiquitin-conjugating enzyme e2-16 kda    | 2                   | 0                         |
| FGRRES_10226            | ubiquitin-like modifier-activating enzyme | 1                   | 0                         |

|                       |                                             |    |   |
|-----------------------|---------------------------------------------|----|---|
|                       | atg-7                                       |    |   |
| FGRRES_04300          | ubl-specific protease                       | 1  | 0 |
| <b>Nuclear import</b> |                                             |    |   |
| FGRRES_07467          | nucleosome assembly protein 1-like 1        | 2  | 0 |
| FGRRES_05972          | nucleoside-diphosphate kinase               | 3  | 0 |
| FGRRES_01429          | nucleoporin-interacting protein nic96       | 2  | 0 |
| FGRRES_05487          | nucleoporin nup82                           | 1  | 0 |
| FGRRES_11878_M        | nucleolin                                   | 5  | 0 |
| FGRRES_10908          | nucleolar protein nop58-like protein        | 22 | 0 |
| FGRRES_02511          | nucleolar protein nop4                      | 5  | 0 |
| FGRRES_07038          | nucleolar protein 9                         | 2  | 0 |
| FGRRES_06243          | nucleolar protein                           | 6  | 0 |
| FGRRES_06165          | nucleolar gtp-binding protein               | 9  | 0 |
| FGRRES_00292          | nucleolar complex protein 2                 | 10 | 0 |
| FGRRES_17145          | nuclear protein snf4                        | 1  | 0 |
| FGRRES_01216          | nuclear protein localization protein 4      | 3  | 0 |
| FGRRES_05671          | nuclear pore protein                        | 5  | 0 |
| FGRRES_09965          | nuclear pore protein                        | 4  | 0 |
| FGRRES_01323          | nuclear pore protein                        | 2  | 0 |
| FGRRES_09165          | nuclear movement protein nudc               | 3  | 0 |
| FGRRES_01185          | nuclear gtp-binding protein nug1            | 10 | 0 |
| FGRRES_10865          | nuclear envelope protein ndc1               | 1  | 0 |
| FGRRES_05038          | nuclear distribution protein pac1           | 1  | 0 |
| FGRRES_11878_M        | nucleolin                                   | 0  | 2 |
| <b>DNA repair</b>     |                                             |    |   |
| FGRRES_09801          | dna topoisomerase ii                        | 1  |   |
| FGRRES_09663          | dna topoisomerase 2-associated protein pat1 | 6  |   |
| FGRRES_05599          | dna repair transcription protein mms19      | 4  |   |
| FGRRES_01052          | proliferating cell nuclear antigen          | 1  | 0 |
| FGRRES_16593          | mortality factor 4-like protein 1           | 3  |   |
