# Supplementary material for: PKR Protects the Major Catalytic Subunit of PKA Cpk1 from FgBlm10-Mediated Proteasome Degradation in Fusarium graminearum
Source: MDPI journal article supplement (doi:10.3390/ijms231810208), 2022-09-06
Supplement: s1 [file s1]

**Table S4****PCR primers used in this study**

| Name                      | Sequence(5'-3')                                           |
|---------------------------|-----------------------------------------------------------|
| BLM10-Seq-1F              | ATGGACGAGAACATCGGACCT                                     |
| BLM10- Seq-1R             | GCAAGAACAAGGAGTGGTCA                                      |
| BLM10- Seq-2F             | TTCCCCAATCATCGACG                                         |
| BLM10- Seq-2R             | GGCAAAGTAACTCTTCCAGAGTACTCC                               |
| PRE5- Seq-F               | ATGTTTCGAAACAACCTACGATAACGATTC                            |
| PRE5- Seq-R               | TTAGCTGTCAACGTCCATACCTTC                                  |
| PRE6- Seq-F               | ATGGTGGATCCCAGCTCCG                                       |
| PRE6- Seq-R               | TTATTCCGCAGCAGAGTCATCTTGA                                 |
| BLM10-1F                  | CAGGTAGCTTCCATACATAGTAGCATA                               |
| BLM10-2R                  | CAGATACGGCAGAGAAATCGCAACCTCAGTGGACAGATGATGTGTGT<br>G      |
| BLM10-3F                  | GTTTAGATTCCAAGTGTCTACTGCTGGCTGGAAGCGAATCAGGCAGG<br>GC     |
| BLM10-4R                  | GACATTATTCTGATACGATCAACGC                                 |
| BLM10-5F                  | TTTGTATGAGCCTGAGGTCATTCAG                                 |
| BLM10-6R                  | CTTGTCCAACCTCGCTCTTCTG                                    |
| BLM10-7F                  | GCTCAATATAGCACCGAGAACT                                    |
| BLM10-8R                  | CTTTGAACCAATCACAAGGCT                                     |
| HYG-F                     | GGCTTGGCTGGAGCTAGTGGAGGTCAA                               |
| HY-R                      | GTATTGACCGATTCTTGCAGTCCGAA                                |
| YG-F                      | GATGTAGGAGGGCGTGGATATGTCCT                                |
| HT-R                      | GTCGACTTAATAACACATTGCGGACGT                               |
| H855F                     | GTCGATGCGACGCAATCGT                                       |
| HT856R                    | ATCAGCCCCACTTGTAGCAGTAGC                                  |
| BLM10 <sup>N392</sup> -3F | GTTTAGATTCCAAGTGTCTACTGCTGGCAGACTCCATGAATCCCTCCAA<br>ATGA |
| PKR-1F                    | TGTGCGTCAACTATGGGTCTGG                                    |
| PKR-2R                    | AATGCTCCTTCAATATCATCTTCTGTCAGATGTTATGTCGTCGAAGAG<br>GC    |
| PKR-3F                    | CGTCCGCAATGTGTTATTAAGTCGACAGTGATGTTTCAGGTTGTCTCGT<br>G    |
| PKR-4R                    | AGCCAGGAGAAATAACGCACC                                     |
| PKR-5F                    | ACGACACCATCACATCGCCTAC                                    |
| PKR-6R                    | AGATCCCTTCTCGACGACATAGAA                                  |
| PKR-7F                    | GCCTTGTGAGCCCTTGTTGTG                                     |
| PKR-8R                    | GGAAACCGAAGTTGCTGTTGAGG                                   |
| GEN-F                     | GAGGTTGCGATTTCTCTGCCGTATCTG                               |
| GEN-R                     | GCCAGCAGTAGACACTTGGAATCTAAAC                              |
| G852-F                    | TCGGCTATGACTGGGCACAACA                                    |
| G850-R                    | GAGCGGCGATACCGTAAAGCAC                                    |

|                                     |                                                                               |
|-------------------------------------|-------------------------------------------------------------------------------|
| G855-R                              | TGTTGGGTTTGAGCTAGGTGGG                                                        |
| G856-F                              | GAATGGTCAAATCAAACCTGCTAGATAT                                                  |
| Blm10-motif-1f                      | GCGCCATGAAAGAACACCG                                                           |
| Blm10-motif-2r:                     | CAGATACGGCAGAGAAATCGCAACCTCCTAATCAATTGTTAGCGA                                 |
| BLM10-motif-3f                      | GTTTAGATTCCAAGTGTCTACTGCTGGCAGGCAGGGCTGTGTTCAG                                |
| BLM10-motif-4r                      | CATATCGTCACTGTTAGTAAAATACGTGTGGT                                              |
| Blm10-motif-5f                      | TATTTTACTTCCGAACAGCT                                                          |
| Blm10-motif-6r                      | GGCAAAGTAACTCTTCCAGA                                                          |
| Blm10-motif-7F                      | TTCGACAACTGGTATCAGAC                                                          |
| Blm10-motif-8R                      | ATAAGTGTCTGGGATGAATGT                                                         |
| PKNTG-                              | AGGAACCCAATCTTCAAACCTCGAGATGTAAGGTTACAACATCATCCC                              |
| BLM10- F:                           | ACT                                                                           |
| BLM10 <sup>N392</sup> -R:           | TGATTTTCAGTAACGTTAAGTGGATCCAATAGACTCCATGAATCCCTCC<br>AAATG                    |
| Blm10-R:                            | TGATTTTCAGTAACGTTAAGTGGATCCGGCAAAGTAACTCTTCCAGAGT<br>ACT                      |
| PKNTG-Pre5-F:                       | AGGAACCCAATCTTCAAACCTCGAGCATCATCACCATCACCATATGTTT<br>CGAAACAACACTACGATAACGATT |
| Pre5-R:                             | TGATTTTCAGTAACGTTAAGTGGATCCGCTGTCAACGTCCATACCTT                               |
| PKNTG-Pre6-F:                       | GAACCCAATCTTCAAACCTCGAGCATCATCACCATCACCATATGGCTTC<br>CGGATACGACAG             |
| Pre6-R:                             | TGATTTTCAGTAACGTTAAGTGGATCCTTCCGCAGCAGAGTCATCT                                |
| Cpk1-RT-F                           | AGCAGTCTCAGCAACGATAC                                                          |
| Cpk1-RT-R                           | GTTCCAAGCGTCCTCAAGATA                                                         |
| Pre6 <sup>D82N</sup> -His-F:        | TTAAACGCAAACGCTCGTATCCTCG                                                     |
| Pre6 <sup>D82N</sup> -His-R:        | CGAGGATACGAGCGTTTGC GTTTAA                                                    |
| Pre5 <sup>K62E</sup> -His-F:        | CTTACCAGAAGGAGCTCTTCACCG                                                      |
| Pre5 <sup>K62E</sup> -His-R:        | CGGTGAAGAGCTCCTTCTGGTAAG                                                      |
| PKR-AD-F:                           | GCCATGGAGGCCAGTGAATTCATGTCCGGCCCTTTCTCC                                       |
| PKR-AD-R:                           | CCACTGCTTGGGTGGAATTCGCCGGTGTGAAGTGGAT                                         |
| Cpk1-AD-F                           | GCCATGGAGGCCAGTGAATTCGCCGGTGTGAAGTGGAT                                        |
| Cpk1-AD-R                           | CCACTGCTTGGGTGGAATTCATGCCTTCACTGGGGTTTCT                                      |
| BLM10-BD-F:                         | GAGGACCTGCATATGATGGACGAGAACATCGGACCT                                          |
| BLM10-BD-R:                         | CTCCATGGCCATATG GGCAAAGTAACTCTTCCAGAGTACTCC                                   |
| Blm10 <sup>1-392</sup> -AD-F        | GCCATGGAGGCCAGTGAATTCATGGACGAGAACATCGGACCTCGCC                                |
| Blm10 <sup>1-392</sup> -AD-R        | CCACTGCTTGGGTGGAATTCAGACTCCATGAATCCCTCCAAATGAGAT<br>AT                        |
| Blm10 <sup>913-1924</sup> -<br>BD-F | ATGGCCATGGAGGCCGAATTCATGGACCCTGAGCGTGCCGCGGGCAT                               |
| Blm10 <sup>913-1924</sup> -<br>BD-F | CGACGGATCCCCGGGAATTCCTCGCTAAGAATTGTCTTGGTCGC                                  |

---
