# Supplementary material for: PKR Protects the Major Catalytic Subunit of PKA Cpk1 from FgBlm10-Mediated Proteasome Degradation in Fusarium graminearum
Source: MDPI journal article supplement (doi:10.3390/ijms231810208), 2022-09-06
Supplement: s1 [file s1]

**Table S1 Mutations identified in the *pkr* suppressor strains**

|                                                                        | Fg00324      | Fg01210      | Fg07282      | Fg05222      | Fg09715     | Fg12901      | Fg05396      | Fg00385         | Fg04083 | Fg03942 | Fg10588 | Fg10589 | Fg00887 |
|------------------------------------------------------------------------|--------------|--------------|--------------|--------------|-------------|--------------|--------------|-----------------|---------|---------|---------|---------|---------|
| Sc                                                                     | <i>SNT1</i>  | <i>BLM10</i> | <i>PRE6</i>  | <i>PRE5</i>  | <i>MIG1</i> | <i>CYC8</i>  | <i>SGF73</i> | <i>NHP6A/6B</i> | NA      | NA      | NA      | NA      | NA      |
| Sp                                                                     | <i>SNT1</i>  | NA           | <i>PRE6</i>  | <i>PRE5/</i> | <i>SCR1</i> | <i>SSN6</i>  | <i>SGF73</i> | <i>NHP6</i>     | NA      | NA      | NA      | NA      | NA      |
| Human                                                                  | <i>NCOR1</i> | <i>PSME4</i> | <i>PSMA7</i> | <i>PSMA1</i> | NA          | <i>KDM6A</i> | <i>ATXN7</i> | <i>HMGB1</i>    | NA      | NA      | NA      | NA      | NA      |
| Mutations identified by whole genome sequencing analysis               |              |              |              |              |             |              |              |                 |         |         |         |         |         |
| H4                                                                     | -            | -            | D82N         | -            | -           | -            | -            | -               | -       | -       | -       | -       | -       |
| H6                                                                     | -            | -            | -            | K62E         | -           | -            | -            | -               | -       | -       | -       | -       | -       |
| H10                                                                    | -            | S392fs       | -            | -            | -           | -            | -            | -               | -       | -       | -       | -       | -       |
| H11                                                                    | A1958fs      | G1380fs      | -            | -            | -           | -            | -            | -               | -       | -       | -       | -       | -       |
| H17                                                                    | Y2135fs      | -            | -            | -            | -           | -            | -            | -               | -       | -       | -       | -       | -       |
| H22                                                                    | -            | -            | -            | -            | -           | G88D         | -            | -               | -       | -       | del     | del     | del     |
| H28                                                                    | -            | -            | -            | -            | -           | -            | -            | -               | R140M   | -       | -       | -       | -       |
| H30                                                                    | -            | -            | -            | -            | -           | -            | L57P         | M368fs          | -       | -       | -       | -       | -       |
| H35                                                                    | -            | -            | -            | -            | -           | -            | R257K        | -               | -       | -       | -       | -       | -       |
| H57                                                                    | -            | -            | -            | -            | K71E        | -            | -            | -               | -       | -       | -       | -       | -       |
| Mutations identified by amplifying and sequencing the interested genes |              |              |              |              |             |              |              |                 |         |         |         |         |         |
| H1                                                                     | -            | -            | -            | -            | -           | -            | -            | -               | NS      | NS      | NS      | NS      | NS      |
| H2                                                                     | -            | -            | -            | -            | -           | -            | -            | -               | NS      | NS      | NS      | NS      | NS      |
| H3                                                                     | -            | -            | -            | -            | -           | -            | -            | -               | NS      | NS      | NS      | NS      | NS      |
| H5                                                                     | A1958fs      | Q1000*       | -            | -            | -           | -            | -            | -               | NS      | NS      | NS      | NS      | NS      |
| H7                                                                     | A1958fs      | -            | -            | -            | -           | -            | -            | -               | NS      | NS      | NS      | NS      | NS      |
| H8                                                                     | -            | -            | -            | -            | -           | -            | -            | -               | NS      | NS      | NS      | NS      | NS      |
| H9                                                                     | -            | Q314*        | -            | -            | -           | -            | -            | -               | NS      | NS      | NS      | NS      | NS      |
| H12                                                                    | -            | -            | -            | -            | -           | -            | -            | -               | NS      | NS      | NS      | NS      | NS      |
| H13                                                                    | -            | S392fs       | -            | -            | -           | -            | -            | -               | NS      | NS      | NS      | NS      | NS      |
| H14                                                                    | -            | -            | -            | -            | -           | -            | -            | -               | NS      | NS      | NS      | NS      | NS      |
| H15                                                                    | -            | L1195fs      | -            | -            | -           | -            | -            | -               | NS      | NS      | NS      | NS      | NS      |
| H16                                                                    | Y2135fs      | -            | -            | -            | -           | -            | -            | -               | NS      | NS      | NS      | NS      | NS      |
| H18                                                                    | -            | -            | -            | -            | -           | -            | -            | -               | NS      | NS      | NS      | NS      | NS      |
| H19                                                                    | -            | -            | -            | -            | -           | -            | -            | -               | NS      | NS      | NS      | NS      | NS      |
| H20                                                                    | -            | -            | -            | -            | -           | -            | -            | -               | NS      | NS      | NS      | NS      | NS      |
| H21                                                                    | -            | L1195fs      | -            | -            | -           | -            | -            | -               | NS      | NS      | NS      | NS      | NS      |
| H23                                                                    | -            | F396fs       | -            | -            | -           | -            | -            | -               | NS      | NS      | NS      | NS      | NS      |
| H24                                                                    | -            | -            | -            | -            | -           | G88D         | -            | -               | NS      | NS      | NS      | NS      | NS      |
| H25                                                                    | -            | L317fs       | -            | -            | -           | -            | -            | -               | NS      | NS      | NS      | NS      | NS      |
| H26                                                                    | Y2135fs      | -            | -            | -            | -           | -            | -            | -               | NS      | NS      | NS      | NS      | NS      |
| H27                                                                    | -            | -            | -            | -            | -           | -            | -            | -               | NS      | NS      | NS      | NS      | NS      |
| H29                                                                    | Y2135fs      | -            | -            | -            | -           | -            | -            | -               | NS      | NS      | NS      | NS      | NS      |
| H31                                                                    | -            | -            | -            | -            | -           | -            | -            | -               | NS      | NS      | NS      | NS      | NS      |
| H32                                                                    | -            | L1195fs      | -            | -            | -           | -            | -            | -               | NS      | NS      | NS      | NS      | NS      |
| H33                                                                    | -            | -            | -            | -            | -           | -            | -            | -               | NS      | NS      | NS      | NS      | NS      |
| H34                                                                    | -            | -            | -            | -            | -           | -            | -            | -               | NS      | NS      | NS      | NS      | NS      |
| H36                                                                    | -            | -            | -            | -            | -           | -            | -            | -               | NS      | NS      | NS      | NS      | NS      |
| H37                                                                    | -            | -            | -            | -            | -           | -            | -            | -               | NS      | NS      | NS      | NS      | NS      |
| H38                                                                    | -            | -            | -            | -            | -           | -            | -            | -               | NS      | NS      | NS      | NS      | NS      |
| H39                                                                    | -            | -            | -            | -            | -           | -            | -            | -               | NS      | NS      | NS      | NS      | NS      |
| H40                                                                    | -            | -            | -            | -            | -           | -            | -            | -               | NS      | NS      | NS      | NS      | NS      |
| H41                                                                    | -            | -            | -            | -            | -           | -            | -            | -               | NS      | NS      | NS      | NS      | NS      |
| H42                                                                    | -            | -            | -            | -            | -           | -            | -            | -               | NS      | NS      | NS      | NS      | NS      |
| H43                                                                    | -            | -            | -            | -            | -           | -            | -            | -               | NS      | NS      | NS      | NS      | NS      |
| H44                                                                    | Y2135fs      | -            | -            | -            | -           | -            | -            | -               | NS      | NS      | NS      | NS      | NS      |
| H45                                                                    | -            | -            | -            | -            | -           | -            | -            | -               | NS      | NS      | NS      | NS      | NS      |
| H46                                                                    | -            | -            | -            | -            | -           | -            | -            | -               | NS      | NS      | NS      | NS      | NS      |
| H47                                                                    | -            | N799fs       | -            | -            | -           | -            | -            | -               | NS      | NS      | NS      | NS      | NS      |
| H48                                                                    | -            | -            | -            | -            | -           | -            | -            | -               | NS      | NS      | NS      | NS      | NS      |
| H49                                                                    | -            | -            | -            | -            | -           | -            | -            | -               | NS      | NS      | NS      | NS      | NS      |
| H50                                                                    | -            | -            | -            | -            | -           | -            | -            | -               | NS      | NS      | NS      | NS      | NS      |
| H51                                                                    | Y2135fs      | -            | -            | -            | -           | -            | -            | -               | NS      | NS      | NS      | NS      | NS      |
| H52                                                                    | Y2135fs      | -            | -            | -            | -           | -            | -            | -               | NS      | NS      | NS      | NS      | NS      |
| H53                                                                    | Y2135fs      | -            | -            | -            | -           | -            | -            | -               | NS      | NS      | NS      | NS      | NS      |
| H54                                                                    | -            | -            | -            | -            | -           | -            | -            | -               | NS      | NS      | NS      | NS      | NS      |
| H55                                                                    | -            | -            | -            | -            | -           | -            | -            | -               | NS      | NS      | NS      | NS      | NS      |
| H56                                                                    | -            | -            | -            | -            | -           | -            | -            | -               | NS      | NS      | NS      | NS      | NS      |
| H58                                                                    | -            | -            | -            | -            | -           | -            | -            | -               | NS      | NS      | NS      | NS      | NS      |
| H59                                                                    | -            | -            | -            | -            | L291fs      | -            | -            | -               | NS      | NS      | NS      | NS      | NS      |
| H60                                                                    | -            | -            | -            | -            | -           | -            | -            | -               | NS      | NS      | NS      | NS      | NS      |

-, sequenced but no changes found

\*, stop codon

fs, frameshift mutation

del, deletion of the whole open reading frame

NS, not sequenced
