# Supplementary material for: PKR Protects the Major Catalytic Subunit of PKA Cpk1 from FgBlm10-Mediated Proteasome Degradation in Fusarium graminearum
Source: MDPI journal article supplement (doi:10.3390/ijms231810208), 2022-09-06
Supplement: s1 [file s1]

**Table.S2 Phenotypes of suppressor strains which mutations in *FgBLM10* in growth, conidiation.**

| Strain      | Growth<br>rate(mm/day) <sup>a,b</sup> | Conidiation<br>( $\times 10^4$<br>conidia/mL) <sup>a,c</sup> |
|-------------|---------------------------------------|--------------------------------------------------------------|
| PH-1        | 9.7 $\pm$ 0.4 <sup>a</sup>            | 153.3 $\pm$ 62.2 <sup>a</sup>                                |
| <i>pkrr</i> | 2.2 $\pm$ 0.2 <sup>g</sup>            | 13.7 $\pm$ 4.2 <sup>d</sup>                                  |
| H4          | 5.7 $\pm$ 0.6 <sup>e</sup>            | 55.6 $\pm$ 17.5 <sup>b</sup>                                 |
| H5          | 6.3 $\pm$ 0.4 <sup>cd</sup>           | 30.8 $\pm$ 17.3 <sup>c</sup>                                 |
| H6          | 6.6 $\pm$ 0.4 <sup>bcd</sup>          | 2.4 $\pm$ 2.1 <sup>e</sup>                                   |
| H9          | 6.9 $\pm$ 0.5 <sup>b</sup>            | 18.2 $\pm$ 12.3 <sup>cd</sup>                                |
| H10         | 6.7 $\pm$ 0.6 <sup>bc</sup>           | 23.8 $\pm$ 5.6 <sup>c</sup>                                  |
| H11         | 6.9 $\pm$ 0.6 <sup>b</sup>            | 14.4 $\pm$ 10.1 <sup>d</sup>                                 |
| H15         | 6.9 $\pm$ 0.4 <sup>b</sup>            | 0.8 $\pm$ 0.2 <sup>e</sup>                                   |
| H21         | 6.8 $\pm$ 0.3 <sup>b</sup>            | 14.1 $\pm$ 7.7 <sup>d</sup>                                  |
| H23         | 7.1 $\pm$ 0.2 <sup>d</sup>            | 0.8 $\pm$ 0.4 <sup>e</sup>                                   |
| H25         | 6.1 $\pm$ 0.4 <sup>de</sup>           | 4.4 $\pm$ 2.5 <sup>e</sup>                                   |
| H32         | 6.6 $\pm$ 0.4 <sup>bcd</sup>          | 2.7 $\pm$ 1.5 <sup>e</sup>                                   |
| H47         | 4.5 $\pm$ 1.3 <sup>f</sup>            | 0 $\pm$ 0 <sup>f</sup>                                       |

<sup>a</sup> Standard deviation (mean  $\pm$  standard deviation) were calculated from at least three independent measurements.

<sup>b</sup> Average daily extension of colony radius.

<sup>c</sup> Conidiation was measured with 5-day-old Carboxymethylcellulose(CMC) culture.

Different letters indicate significant differences based on ANOVA analysis followed by Duncan's multiple range test ( $P = 0.05$ ) in a, b, c, d, e, f, g.
