# Supplementary material for: PKR Protects the Major Catalytic Subunit of PKA Cpk1 from FgBlm10-Mediated Proteasome Degradation in Fusarium graminearum
Source: Int J Mol Sci. 2022 Sep 6;23(18):10208. doi: 10.3390/ijms231810208 (PMC9499325; doi:10.3390/ijms231810208)
Supplement: Supplementary file 1 [file ijms-23-10208-s001.zip]

Archive with 5 entries (5 files):
- Table S1 mutant sites.pdf
- Table S3 Proteins coimmunoprecipitated with FgBlm10.pdf
- Table S4 primer.pdf
- supplementary figures.pdf
- New Table S2 suppressor growth rate conidiation infection.pdf
